# Supplementary material for: Factors Impacting Efficacy of AAV-Mediated CRISPR-Based Genome Editing for Treatment of Choroidal Neovascularization
Source: PubMed Central journal article supplement — Mol Ther Methods Clin Dev. 2020 Jan 23;17:409–17. doi: 10.1016/j.omtm.2020.01.006 (PMC7044682; doi:10.1016/j.omtm.2020.01.006), 2020-01-23
Supplement: mmc1.pdf [file mmc1.pdf]

**OMTM, Volume 17**

**Supplemental Information**

**Factors Impacting Efficacy of AAV-Mediated  
CRISPR-Based Genome Editing  
for Treatment of Choroidal Neovascularization**

**Sook Hyun Chung, Iris Natalie Mollhoff, Uyen Nguyen, Amy Nguyen, Natalie Stucka, Eric Tieu, Suman Manna, Ratheesh Kumar Meleppat, Pengfei Zhang, Emerald Lovece Nguyen, Jared Fong, Robert Zawadzki, and Glenn Yiu**

## Supplementary Figure 1

(A) IB4-stained flat mount immunohistochemistry of CNV lesions from eyes injected with saline or 0.1mg aflibercept (Scale bars = 100  $\mu$ m). (B) Bar graphs comparing CNV size measured from IB4-staining (n=9). \*P < 0.05, Student's t-test. Error bars = SEM.

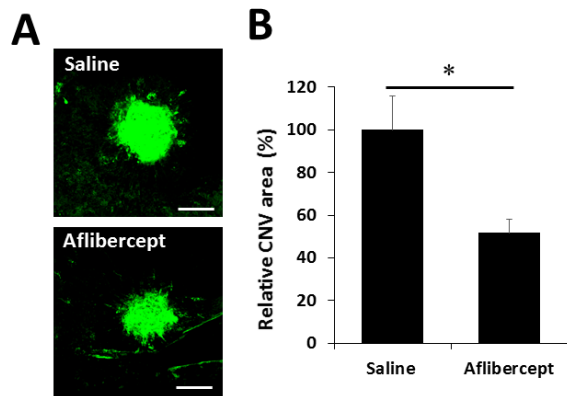

**Supplementary Table 1.**

| <b>Site</b>          | <b>Gene</b>        | <b>Assay</b>    | <b>Direction</b> | <b>Sequence (5' - 3')</b>      |
|----------------------|--------------------|-----------------|------------------|--------------------------------|
| SpCas9-V1            | Mouse <i>VEGFa</i> | T7E1            | Forward          | GTCCAACCTTCTGGGCTCTTCTCG       |
| SpCas9-V2            | Mouse <i>VEGFa</i> | T7E1            | Reverse          | CCTCCACGTACGACGACAGAG          |
| SaCas9-V1            | Mouse <i>VEGFa</i> | T7E1            | Forward          | TGGCGAGCGAACAGAGAGAGGGACAGGGGC |
| SaCas9-V2            | Mouse <i>VEGFa</i> | T7E1            | Reverse          | ACCCCCTCCCCCTCCACGTACGACGACAGA |
| SpCas9-V1            | Mouse <i>VEGFa</i> | Deep Sequencing | Forward          | TTCGTCCAACCTTCTGGGCTCTTCTC     |
| SaCas9-V1            | Mouse <i>VEGFa</i> | Deep Sequencing | Reverse          | TTCGTCCAACCTTCTGGGCTCTTCTC     |
| AAV-CRISPR Construct | AAV ITR            | qPCR            | Forward          | GGAACCCCTAGTGATGGAGTT          |
|                      | AAV ITR            | qPCR            | Reverse          | CGGCCTCAGTGAGCGA               |
